# Supplementary material for: Simulating impacts on UK air quality from net-zero forest planting scenarios
Source: Copernicus journal article supplement (doi:10.5194/acp-23-13713-2023), 2023-11-03
Supplement: Supplementary file 1 [file acp-23-13713-2023-supplement.pdf]

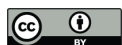

*Supplement of*

## **Simulating impacts on UK air quality from net-zero forest planting scenarios**

**Gemma Purser et al.**

*Correspondence to:* Gemma Purser ([gepurse25@ceh.ac.uk](mailto:gepurse25@ceh.ac.uk))

The copyright of individual parts of the supplement might differ from the article licence.

## Supplementary material

Figure S1. EMEP4UK (2018) model runs for 4 planting scenarios showing isoprene emissions (top row), the difference in emissions between planting scenario and base case (middle row) and the percentage difference in emissions between planting scenarios and base case (bottom row)

Table S1. EMEP4UK (2018) model runs for baseline and 4 planting scenarios showing monthly isoprene emissions for UK

Figure S2. EMEP4UK (2018) model runs for 4 planting scenarios showing total monoterpene emissions (top row), the difference in emissions between planting scenario and base case (middle row) and the percentage difference in emissions between planting scenarios and base case (bottom row)

Table S2. EMEP4UK (2018) model runs for baseline and 4 planting scenarios showing monthly total monoterpene emissions for UK

Table S3. EMEP4UK (2018) model runs for baseline and 4 planting scenarios showing monthly ozone concentrations for UK

Table S4. EMEP4UK (2018) model runs for baseline and 4 planting scenarios showing monthly PM<sub>2.5</sub> concentrations for UK

Table S5. EMEP4UK (2018) model runs for baseline and 4 planting scenarios showing monthly SOA concentrations for UK

Table S6. Uncertainties of isoprene ( $E_{iso}$ ) and monoterpene ( $E_{mtp}$ ) emissions used in the model scenarios for alder, aspen, sitka spruce and eucalyptus and taken from experimental data in Purser et al, 2021.

Figure S1. EMEP4UK (2018) model runs for 4 planting scenarios showing isoprene emissions (top row), the difference in emissions between planting scenario and base case (middle row) and the percentage difference in emissions between planting scenarios and base case (bottom row)

Jan 2018

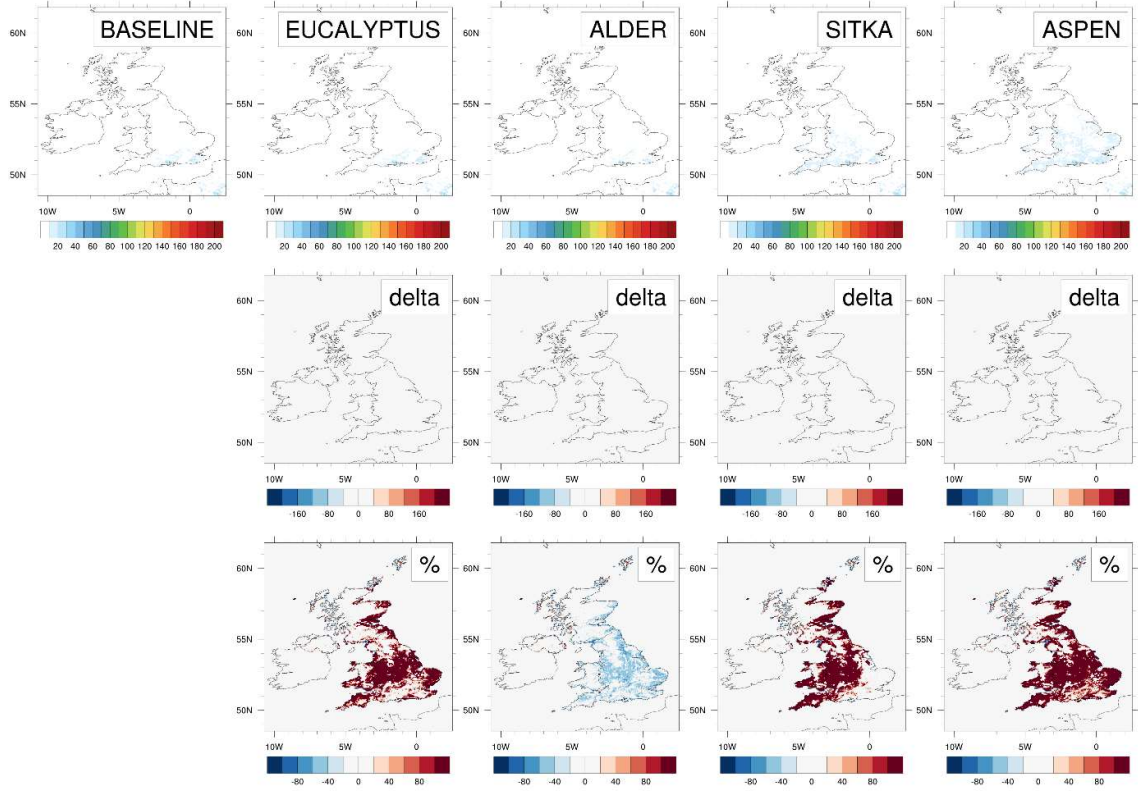

Feb 2018

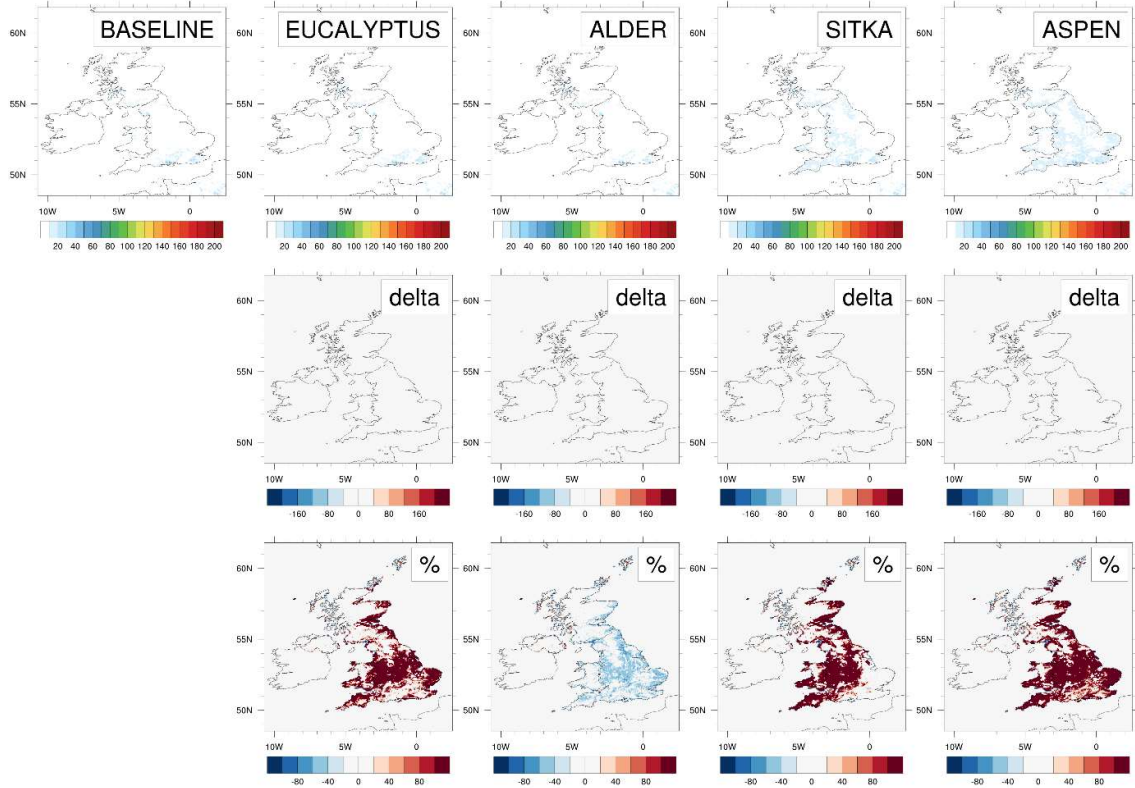

Mar 2018

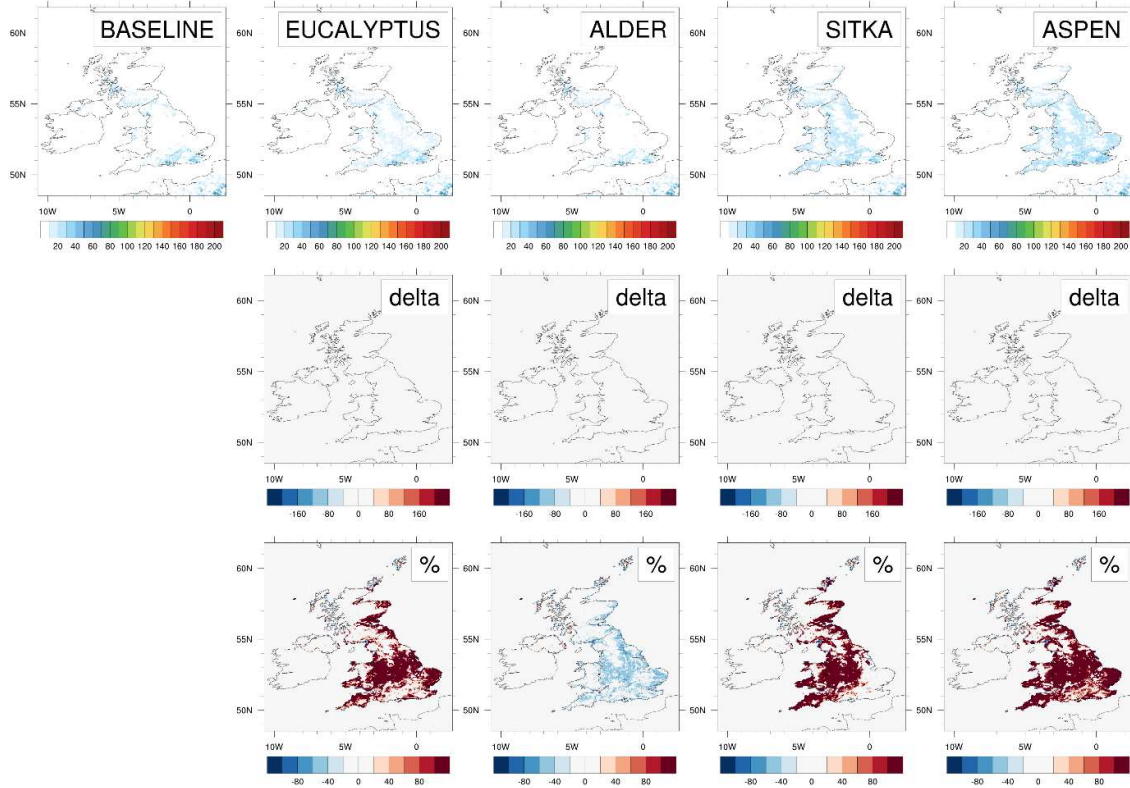

Apr 2018

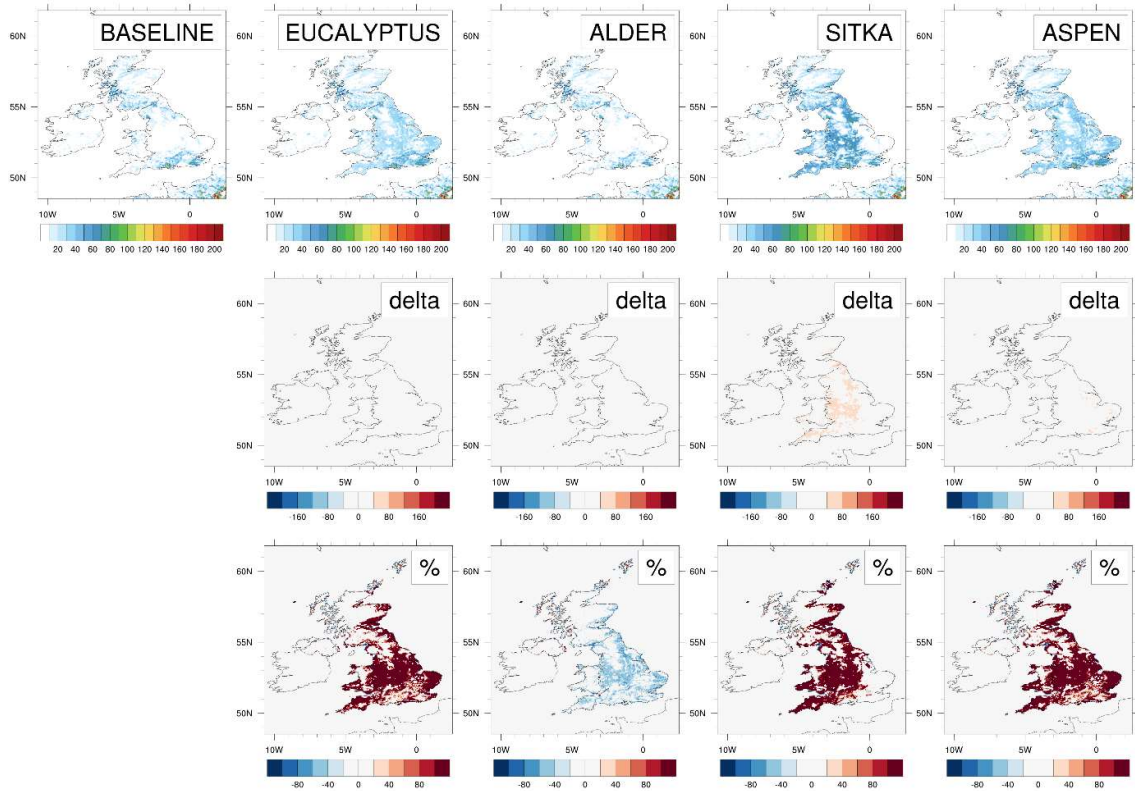

May 2018

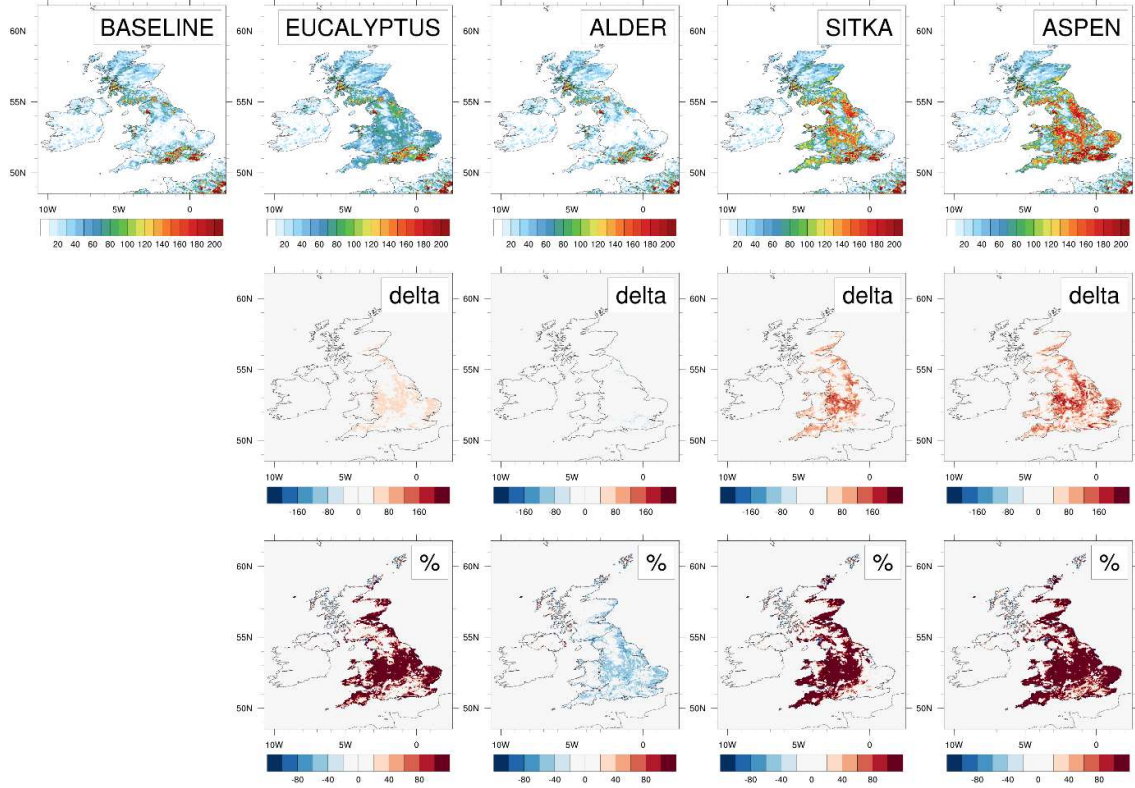



Jun 2018

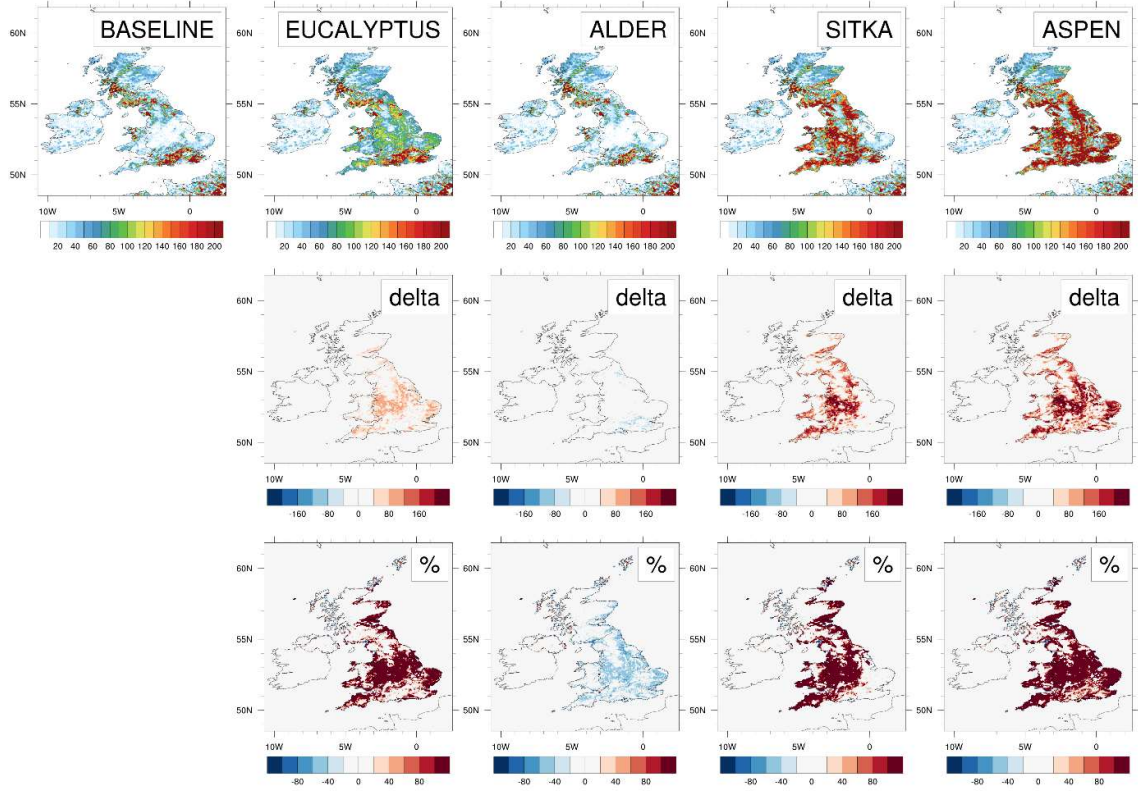



Jul 2018

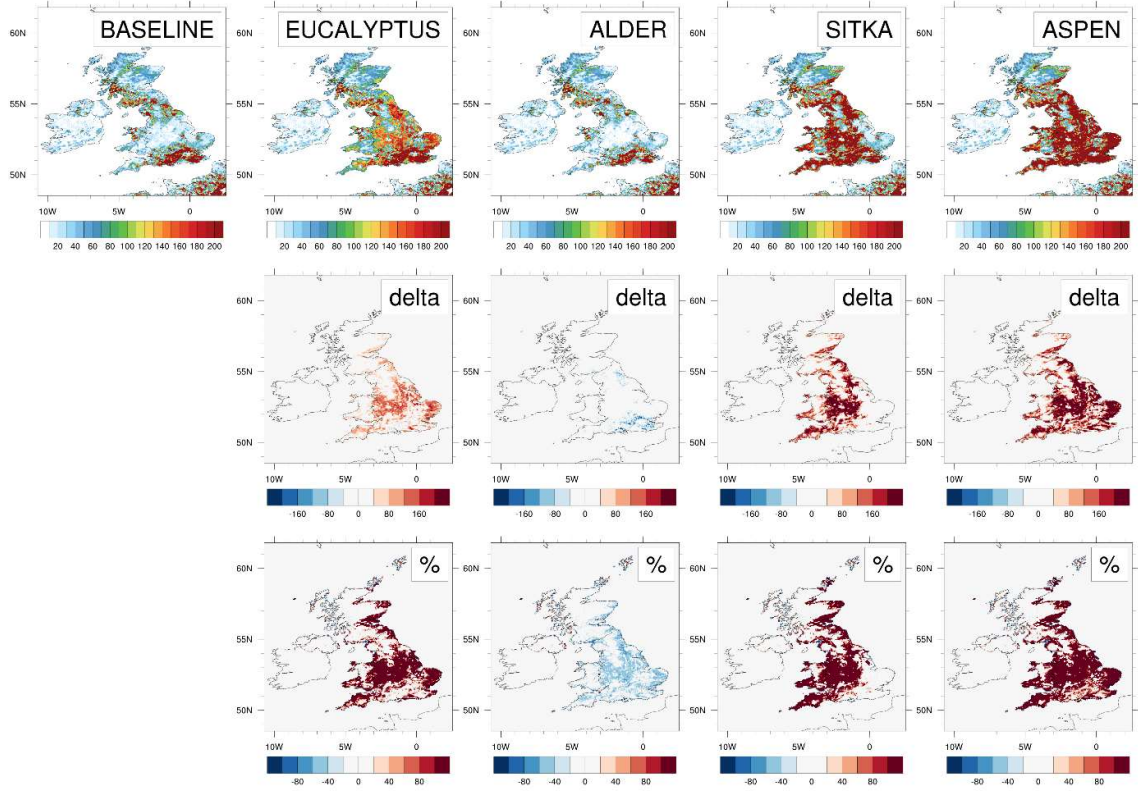

Aug 2018

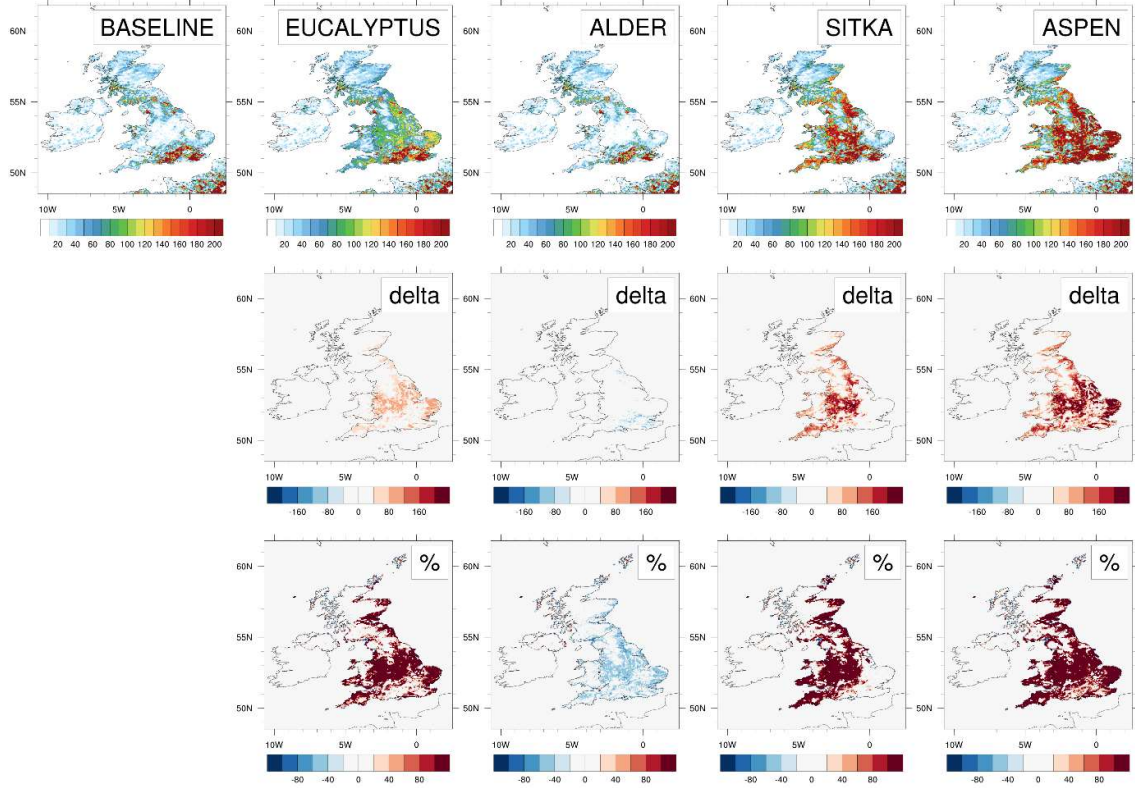

Sep 2018

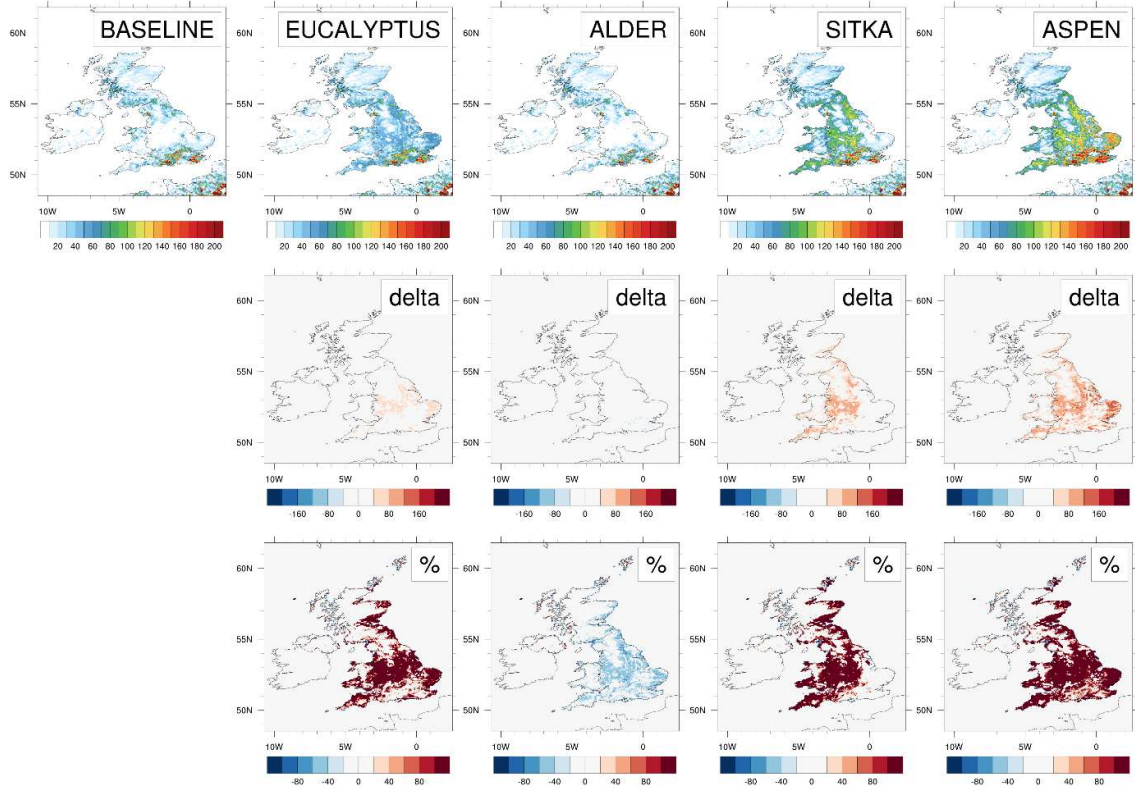

Oct 2018

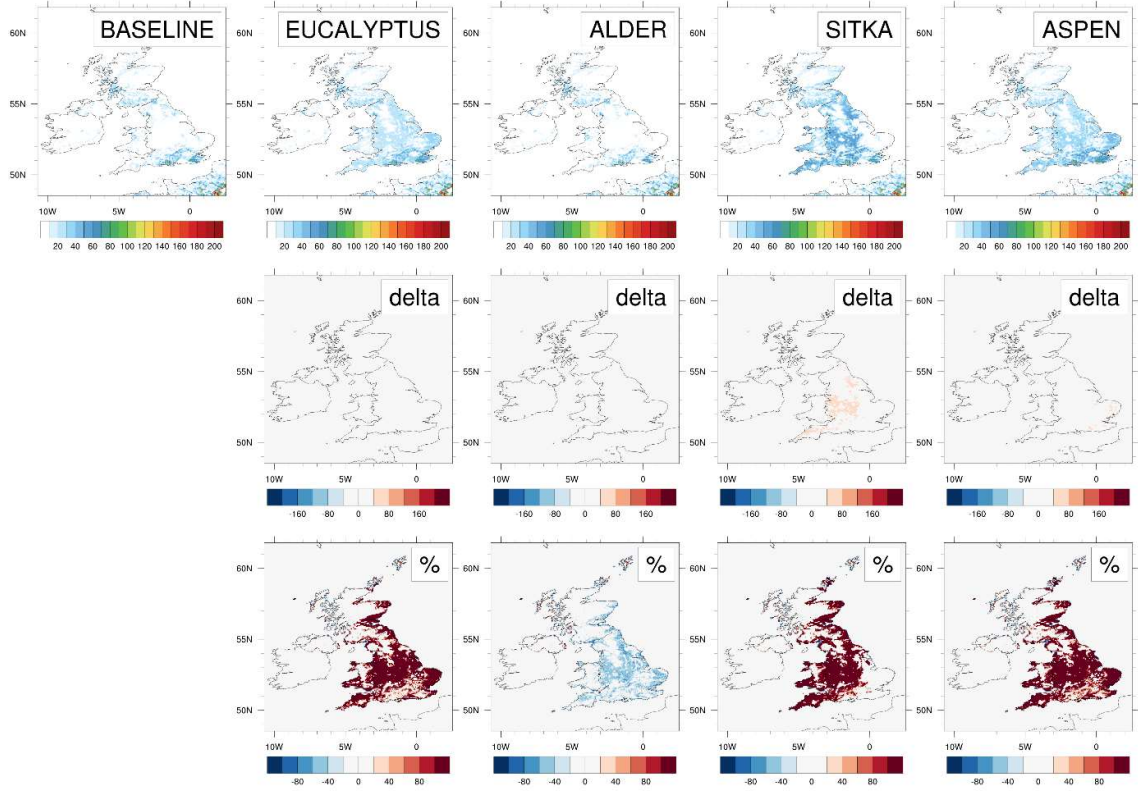

Nov 2018

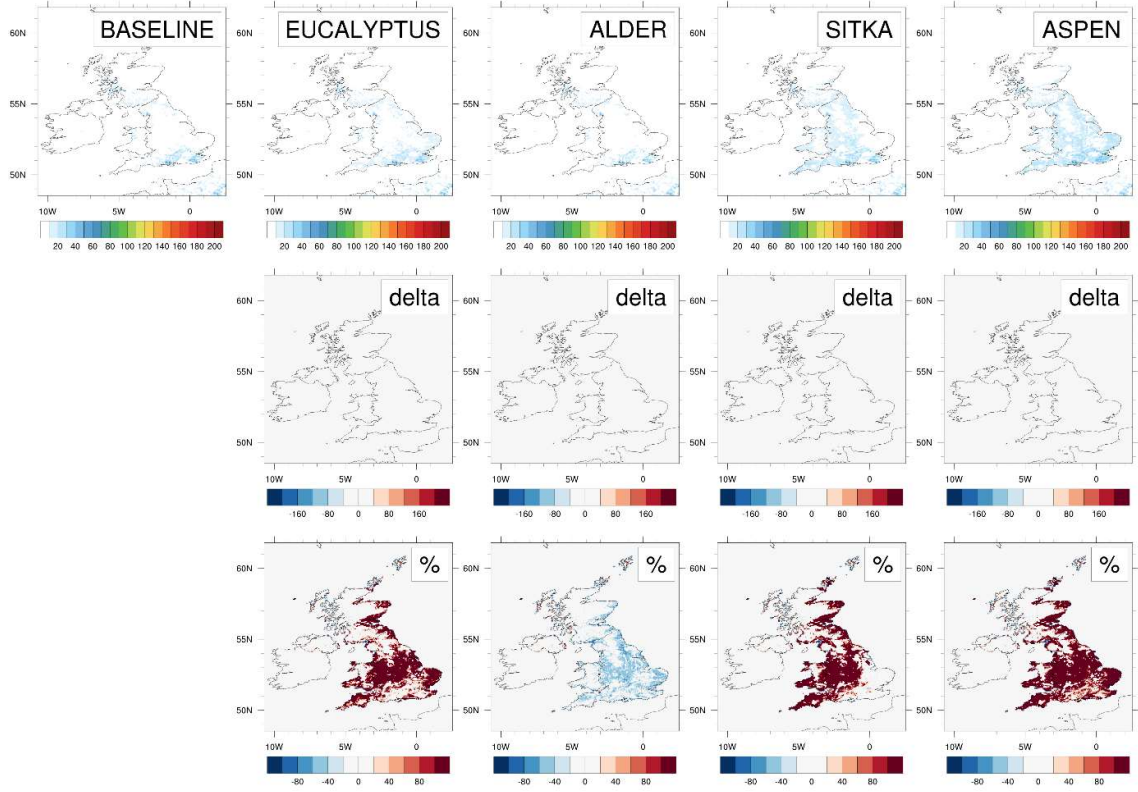



Dec 2018

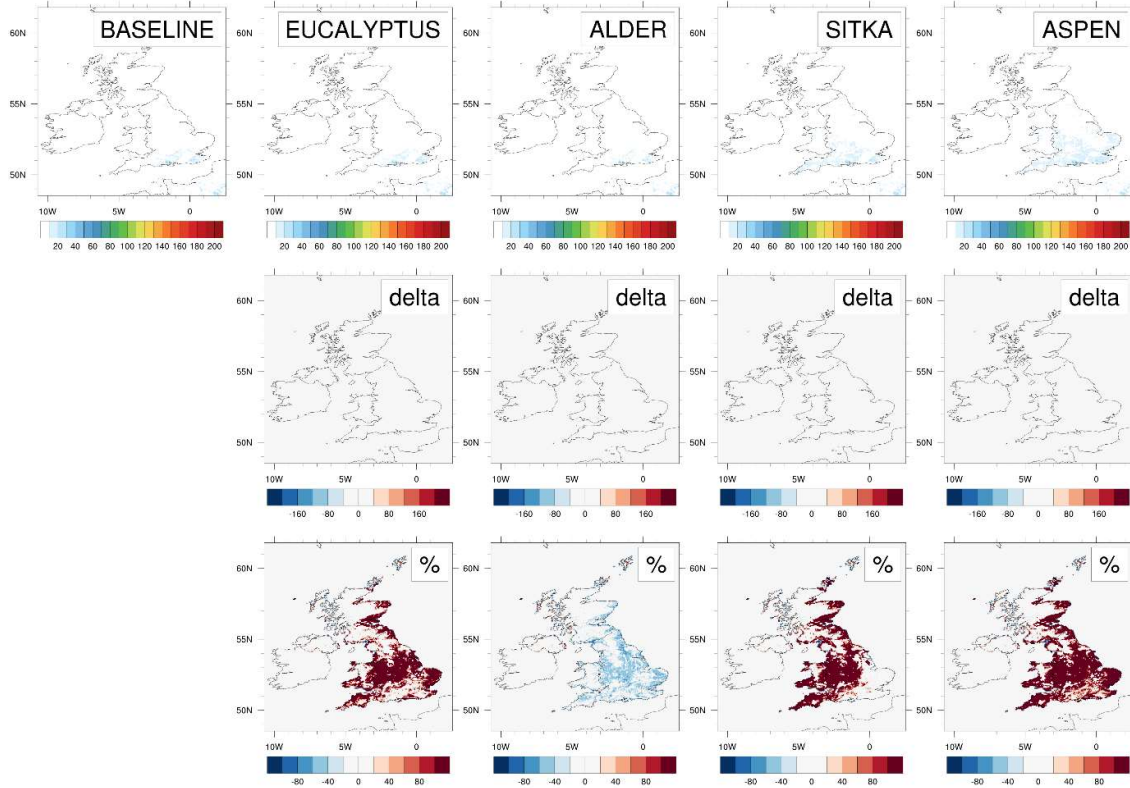

Table S1. EMEP4UK (2018) model runs for baseline and 4 planting scenarios showing monthly isoprene emissions for UK

| Isoprene (kt) | Baseline | Alder | Aspen | Eucalyptus | Spruce |
|---------------|----------|-------|-------|------------|--------|
| Jan           | 0.55     | 0.46  | 1.35  | 0.84       | 1.06   |
| Feb           | 0.73     | 0.63  | 1.67  | 1.07       | 1.35   |
| Mar           | 1.33     | 1.15  | 3.1   | 1.98       | 2.48   |
| Apr           | 2.66     | 2.33  | 5.43  | 4.73       | 5.93   |
| May           | 8.67     | 7.55  | 19.95 | 12.89      | 16.03  |
| Jun           | 12.76    | 11.14 | 28.98 | 18.73      | 23.37  |
| Jul           | 17.08    | 14.55 | 41.26 | 25.96      | 31.86  |
| Aug           | 10.53    | 8.93  | 26.14 | 16.28      | 19.89  |
| Sep           | 5.74     | 4.89  | 13.88 | 8.74       | 10.78  |
| Oct           | 2.18     | 1.89  | 4.59  | 3.95       | 4.93   |
| Nov           | 1.13     | 0.97  | 2.7   | 1.7        | 2.11   |
| Dec           | 0.53     | 0.44  | 1.29  | 0.8        | 1.01   |



Figure S2. EMEP4UK (2018) model runs for 4 planting scenarios showing total monoterpene emissions (top row), the difference in emissions between planting scenario and base case (middle row) and the percentage difference in emissions between planting scenarios and base case (bottom row)

Jan 2018

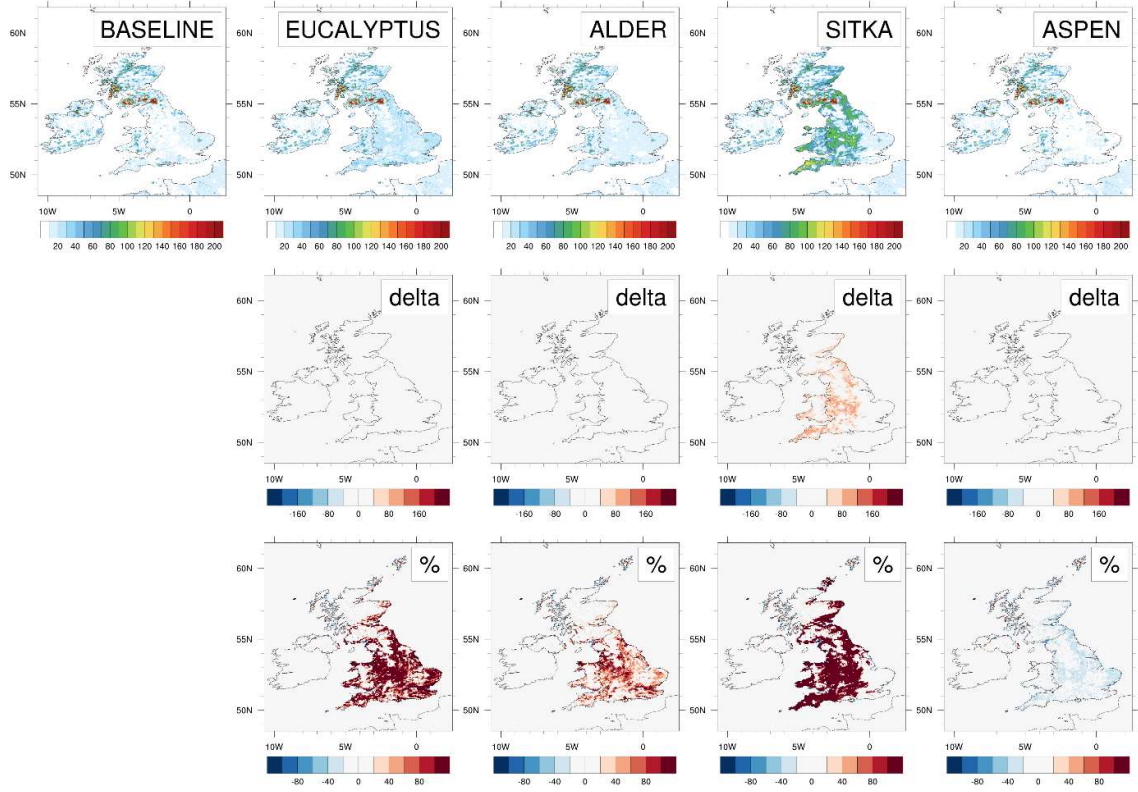

Feb 2018

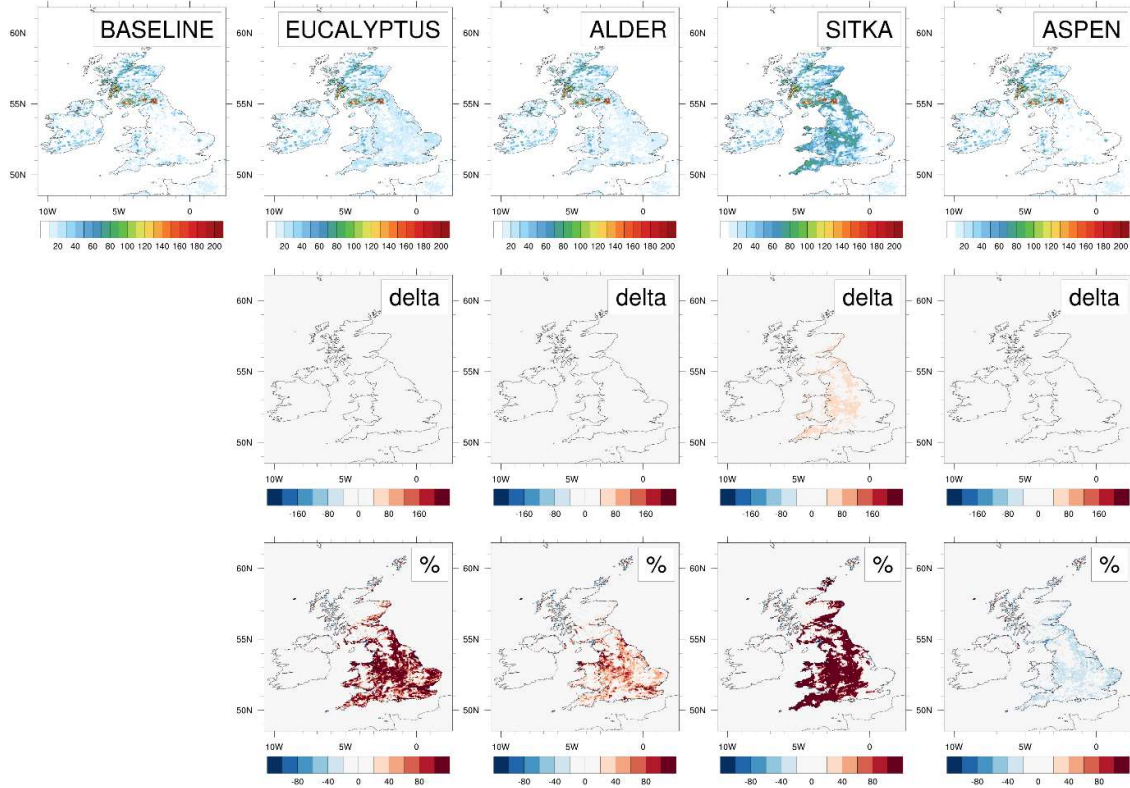

Mar 2018

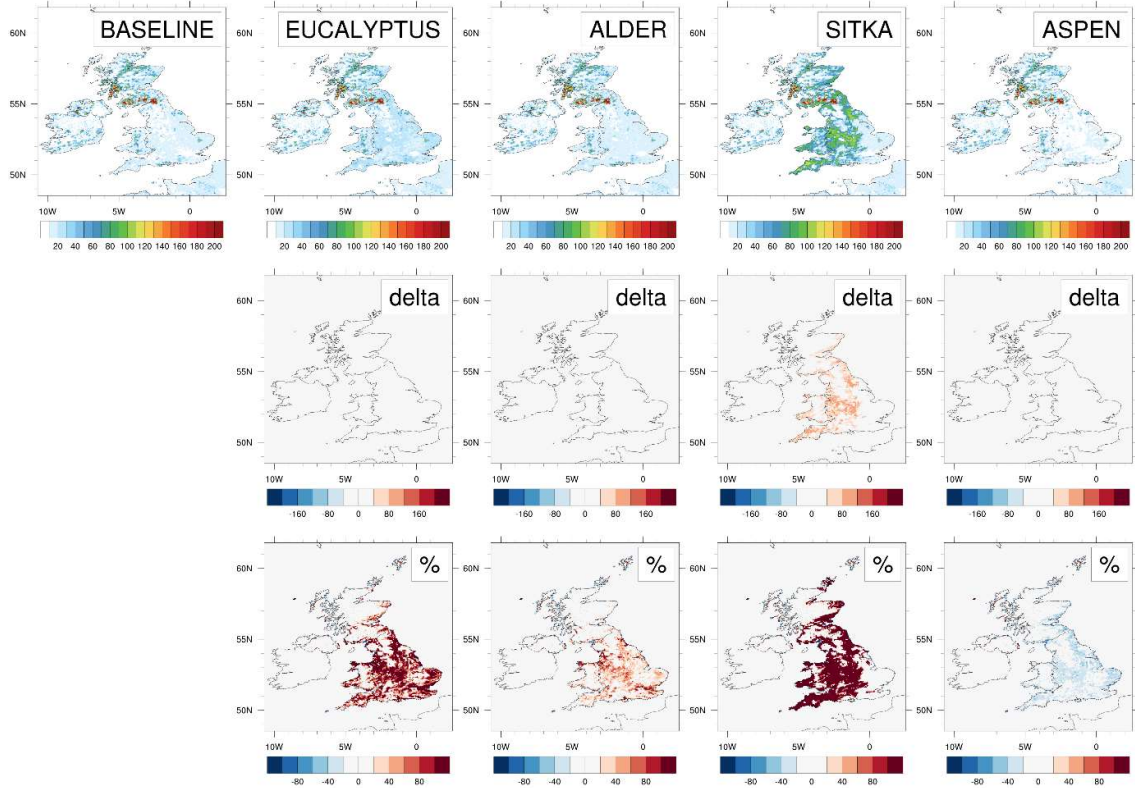

Apr 2018

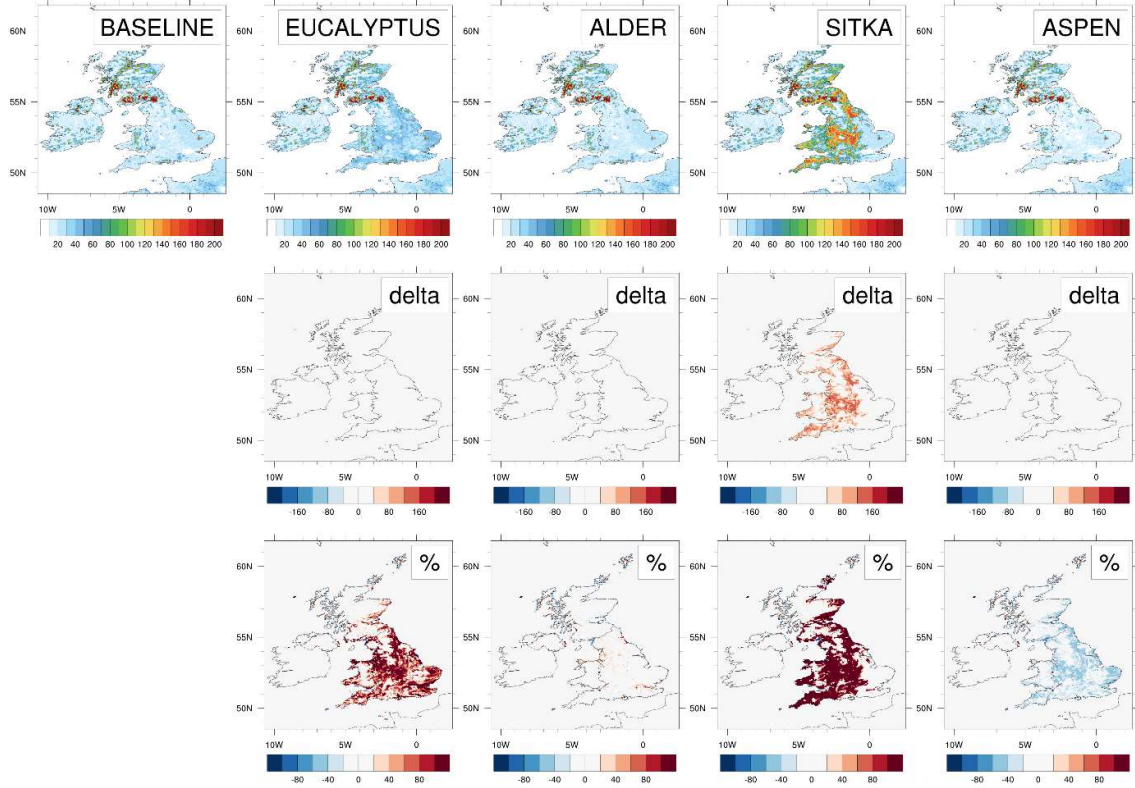

May 2018

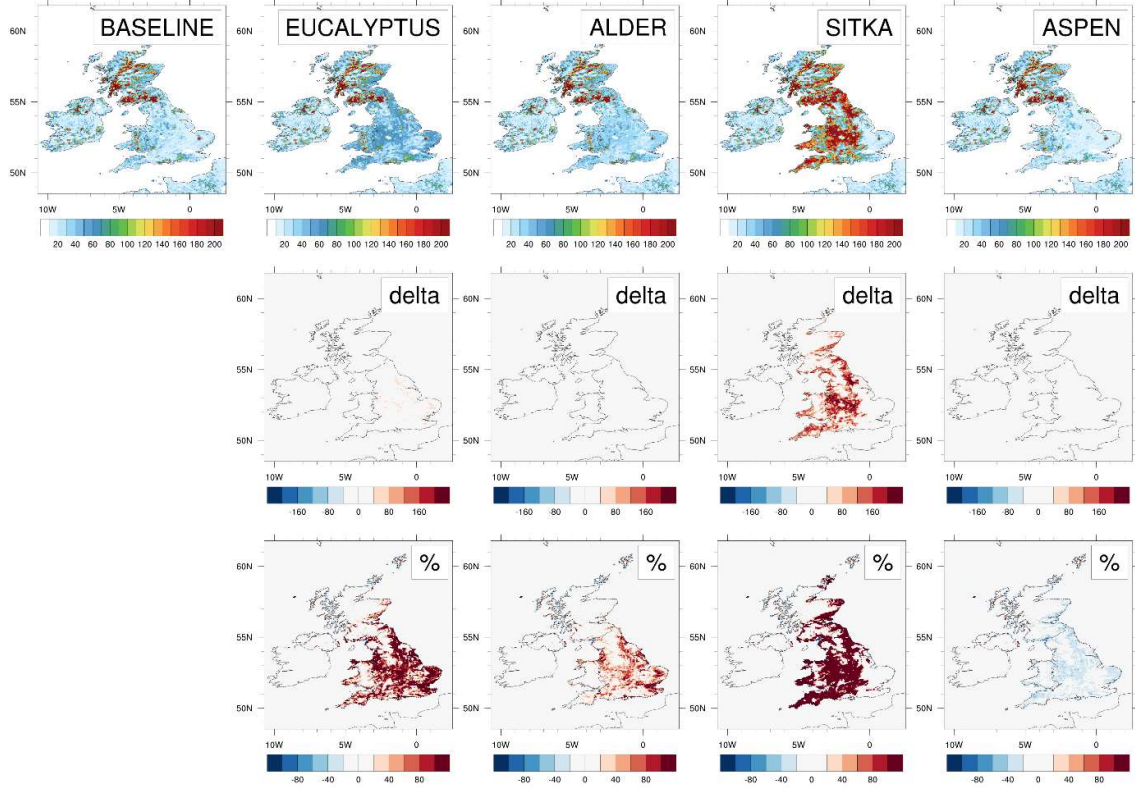



Jun 2018

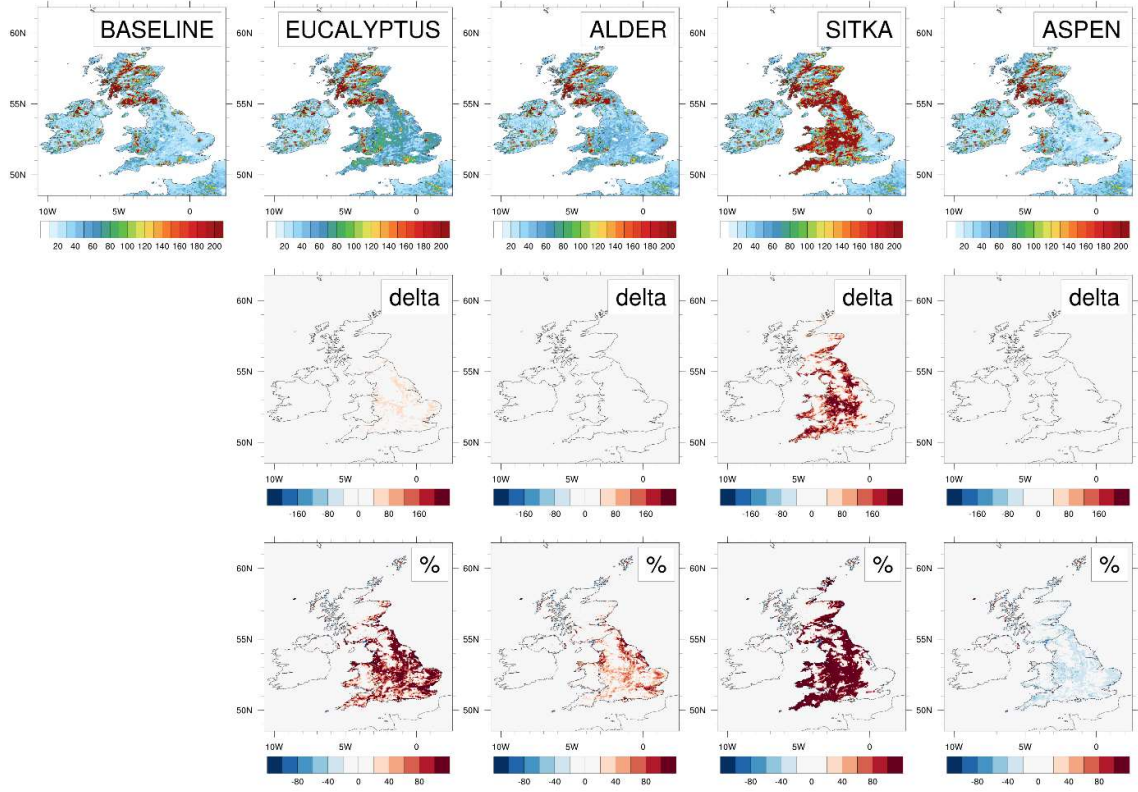



Jul 2018

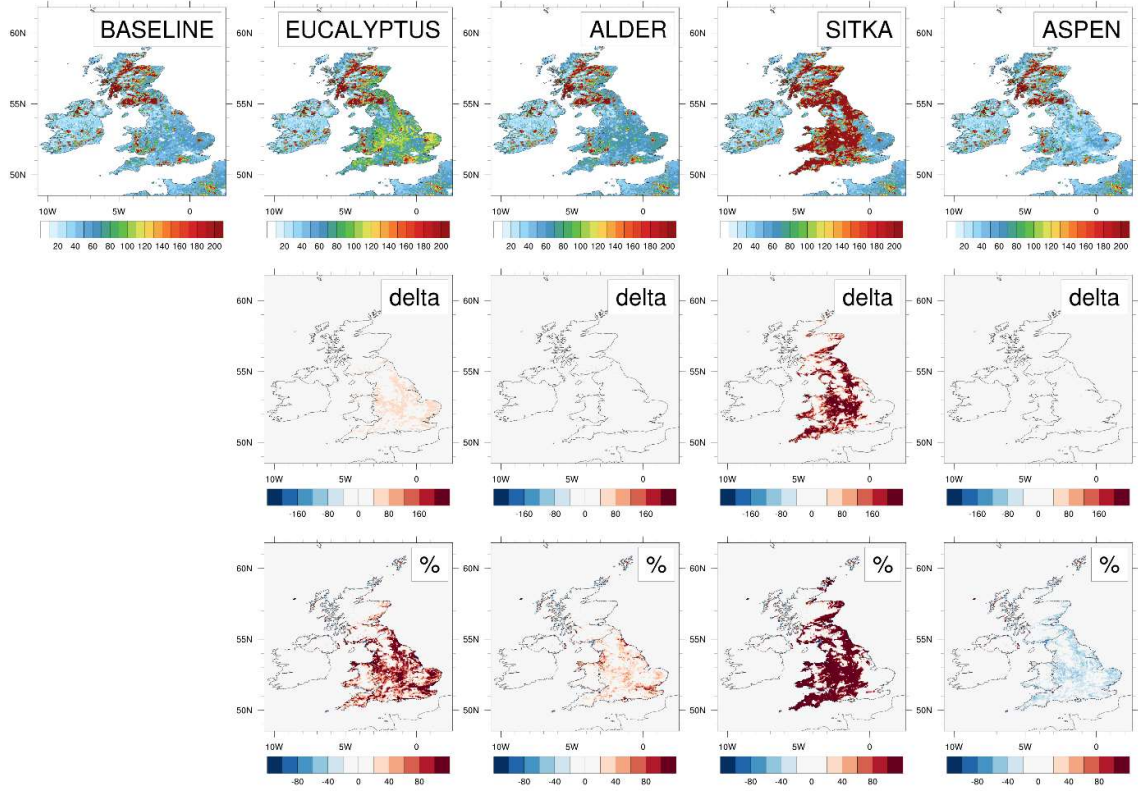

Aug 2018

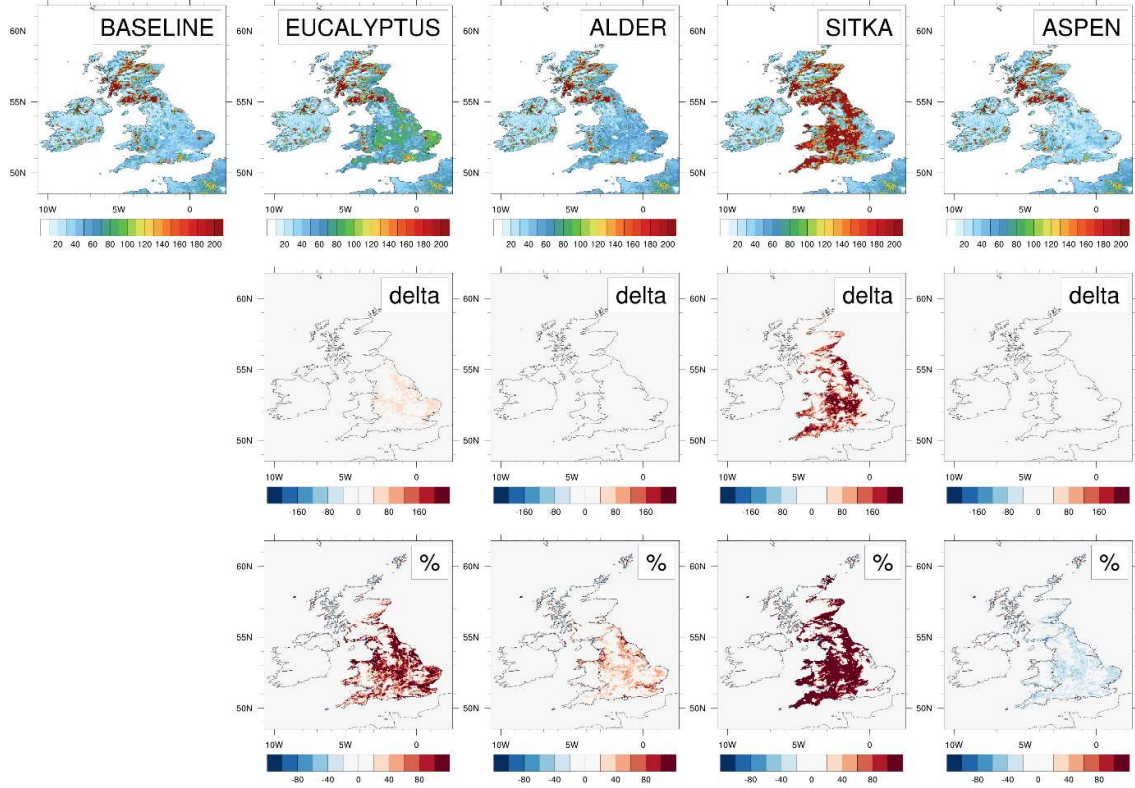

Sep 2018

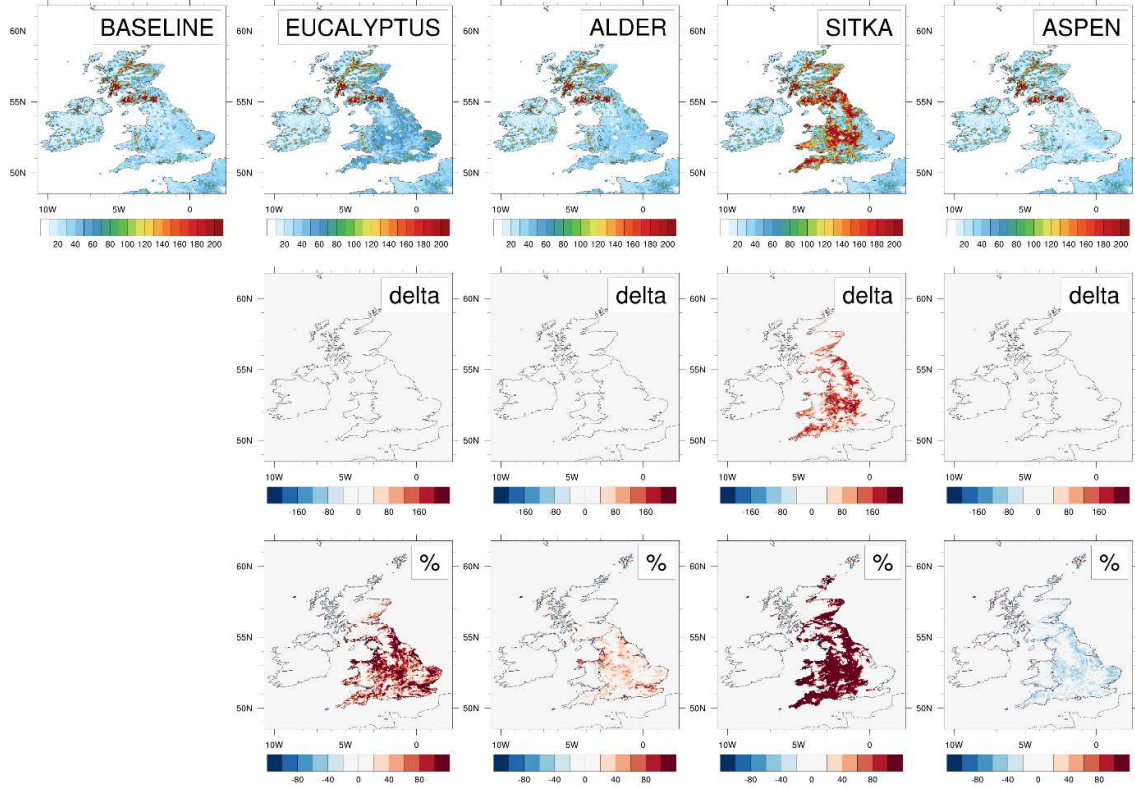

Oct 2018

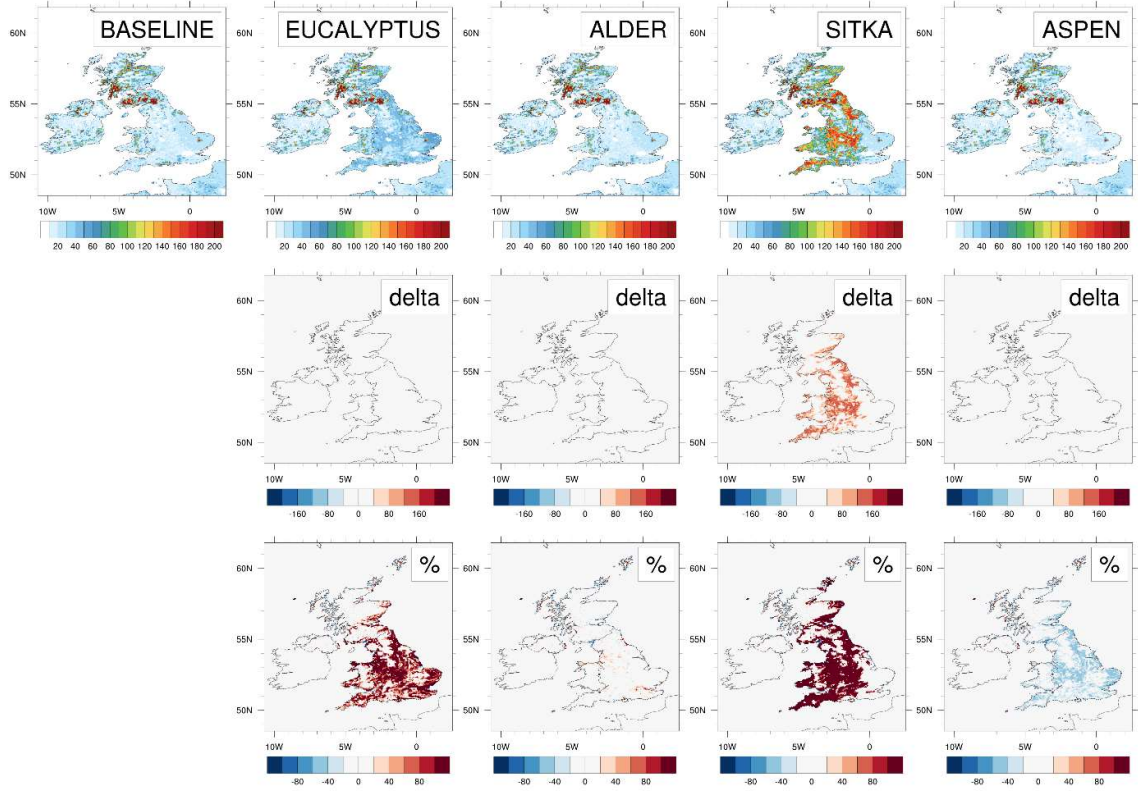

Nov 2018

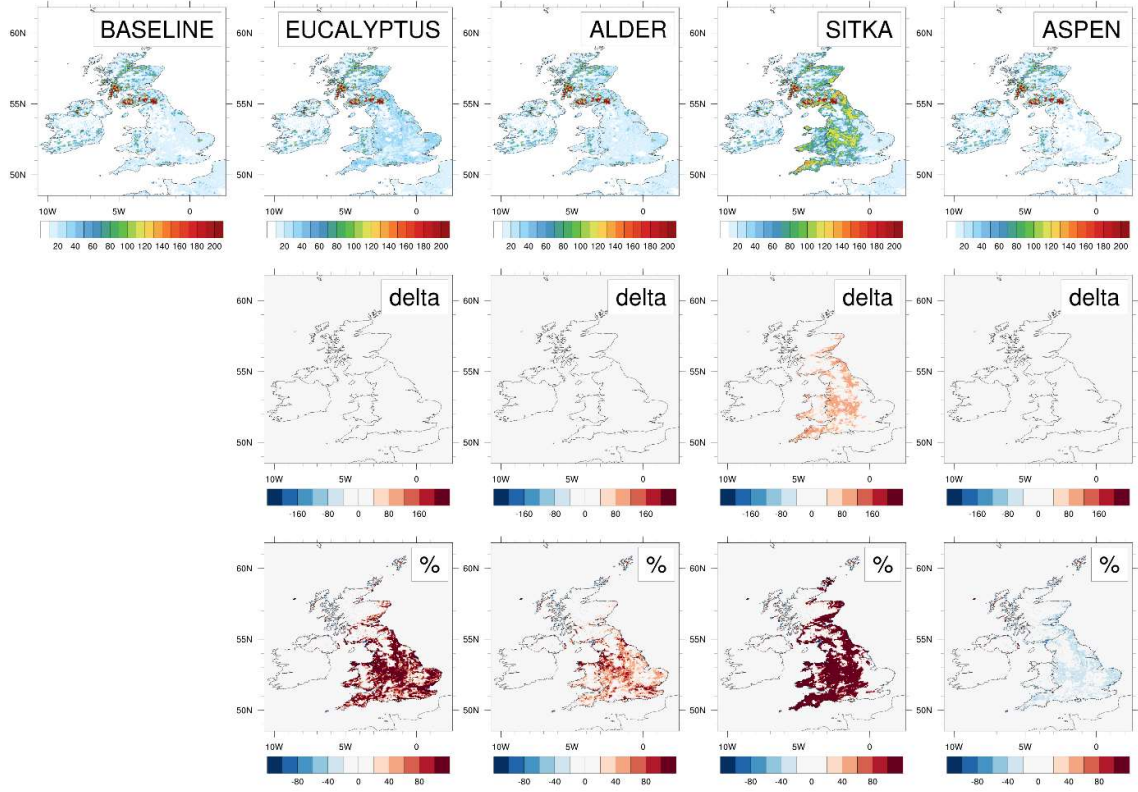



Dec 2018

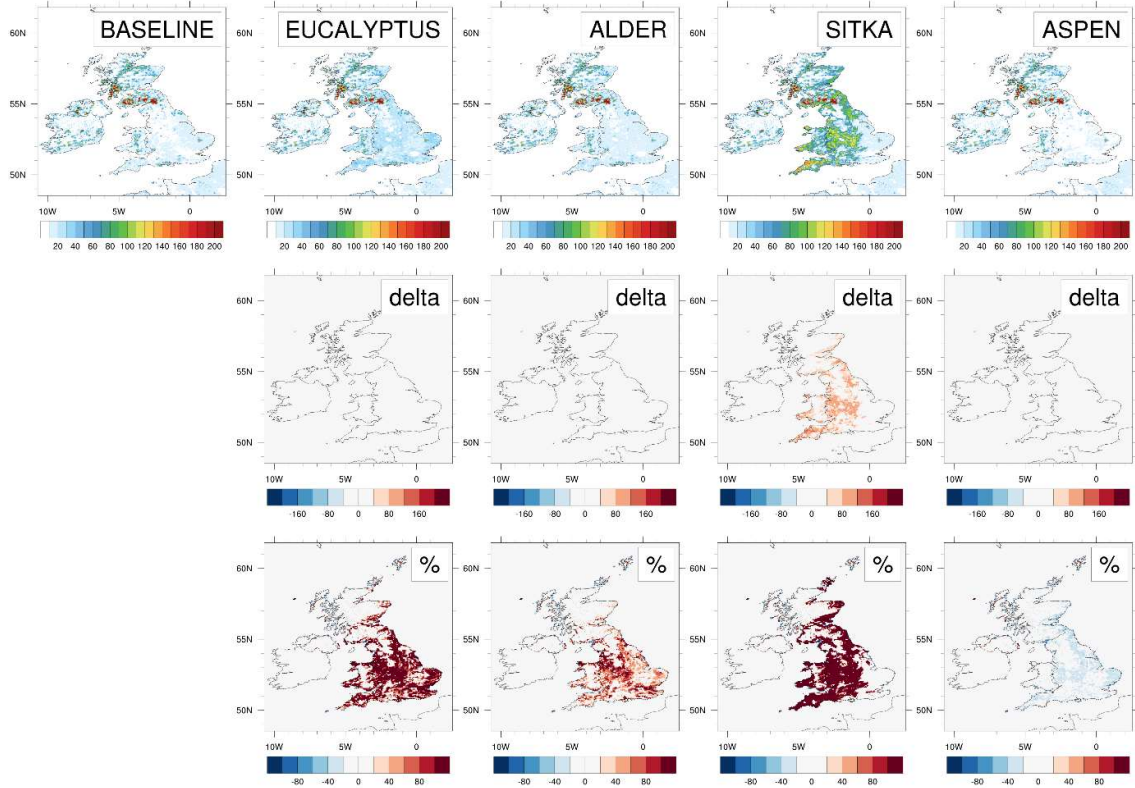

Table S2. EMEP4UK (2018) model runs for baseline and 4 planting scenarios showing monthly total monoterpene emissions for UK

| Total monoterpene (kt) |          |       |       |            |        |
|------------------------|----------|-------|-------|------------|--------|
|                        | Baseline | Alder | Aspen | Eucalyptus | Spruce |
| Jan                    | 4.97     | 5.44  | 4.66  | 6.36       | 10.43  |
| Feb                    | 4.34     | 4.66  | 4.04  | 5.36       | 8.58   |
| Mar                    | 5.54     | 5.91  | 5.11  | 6.8        | 10.86  |
| Apr                    | 8.18     | 8.17  | 7.36  | 10         | 15.91  |
| May                    | 12.69    | 13.52 | 11.81 | 15.49      | 24.18  |
| Jun                    | 16.26    | 17.18 | 15.05 | 19.55      | 30.35  |
| Jul                    | 20.31    | 21.26 | 18.41 | 24.4       | 38.15  |
| Aug                    | 15.95    | 16.87 | 14.52 | 19.46      | 30.67  |
| Sep                    | 11.73    | 12.33 | 10.65 | 14.21      | 22.44  |
| Oct                    | 8.76     | 8.72  | 7.94  | 10.91      | 17.44  |
| Nov                    | 6.49     | 7.02  | 6.05  | 8.12       | 13.07  |
| Dec                    | 5.55     | 6.1   | 5.21  | 7.13       | 11.77  |

Table S3. EMEP4UK (2018) model runs for baseline and 4 planting scenarios showing monthly ozone concentrations for UK

| UK mean ozone concentrations (ppb) |          |       |       |            |        |
|------------------------------------|----------|-------|-------|------------|--------|
|                                    | Baseline | Alder | Aspen | Eucalyptus | Spruce |
| Jan                                | 26.72    | 27.10 | 27.13 | 27.16      | 26.84  |
| Feb                                | 30.24    | 30.73 | 30.77 | 30.79      | 30.41  |
| Mar                                | 35.17    | 35.44 | 35.50 | 35.46      | 35.11  |
| Apr                                | 38.16    | 38.93 | 39.05 | 38.86      | 38.48  |
| May                                | 39.35    | 39.28 | 39.37 | 40.62      | 40.23  |
| Jun                                | 34.15    | 34.35 | 34.72 | 35.94      | 35.60  |
| Jul                                | 31.74    | 32.15 | 32.70 | 33.81      | 33.45  |
| Aug                                | 28.58    | 28.67 | 28.80 | 29.90      | 29.46  |
| Sep                                | 29.72    | 29.84 | 29.85 | 30.90      | 30.36  |
| Oct                                | 26.62    | 27.30 | 27.32 | 27.48      | 27.06  |
| Nov                                | 22.47    | 23.06 | 23.10 | 23.05      | 22.73  |
| Dec                                | 22.39    | 22.93 | 22.97 | 22.93      | 22.61  |



Table S4. EMEP4UK (2018) model runs for baseline and 4 planting scenarios showing monthly PM<sub>2.5</sub> concentrations for UK

| UK mean baseline PM <sub>2.5</sub> concentrations ( $\mu\text{g m}^{-3}$ ) |          |       |       |            |        |
|----------------------------------------------------------------------------|----------|-------|-------|------------|--------|
|                                                                            | Baseline | Alder | Aspen | Eucalyptus | Spruce |
| Jan                                                                        | 6.98     | 6.71  | 6.70  | 6.65       | 6.71   |
| Feb                                                                        | 6.39     | 6.18  | 6.16  | 6.12       | 6.16   |
| Mar                                                                        | 8.26     | 7.94  | 7.92  | 7.84       | 7.92   |
| Apr                                                                        | 9.85     | 9.28  | 9.22  | 9.09       | 9.33   |
| May                                                                        | 9.02     | 7.90  | 7.59  | 8.18       | 8.53   |
| Jun                                                                        | 6.17     | 5.56  | 5.34  | 5.79       | 6.05   |
| Jul                                                                        | 4.35     | 3.95  | 3.79  | 4.14       | 4.45   |
| Aug                                                                        | 3.14     | 2.90  | 2.81  | 2.99       | 3.13   |
| Sep                                                                        | 3.93     | 3.55  | 3.45  | 3.69       | 3.83   |
| Oct                                                                        | 6.69     | 6.37  | 6.29  | 6.35       | 6.45   |
| Nov                                                                        | 11.65    | 11.36 | 11.34 | 11.25      | 11.30  |
| Dec                                                                        | 8.11     | 7.87  | 7.84  | 7.79       | 7.85   |

Table S5.. EMEP4UK (2018) model runs for baseline and 4 planting scenarios showing monthly SOA concentrations for UK

| UK mean SOA concentrations ( $\mu\text{g m}^{-3}$ ) |          |       |       |            |        |
|-----------------------------------------------------|----------|-------|-------|------------|--------|
| month                                               | Baseline | Alder | Aspen | Eucalyptus | Spruce |
| Jan                                                 | 0.001    | 0.001 | 0.001 | 0.001      | 0.001  |
| Feb                                                 | 0.001    | 0.001 | 0.001 | 0.001      | 0.002  |
| Mar                                                 | 0.004    | 0.004 | 0.004 | 0.005      | 0.007  |
| Apr                                                 | 0.055    | 0.053 | 0.051 | 0.057      | 0.072  |
| May                                                 | 0.321    | 0.288 | 0.267 | 0.318      | 0.366  |
| Jun                                                 | 0.174    | 0.157 | 0.141 | 0.184      | 0.242  |
| Jul                                                 | 0.137    | 0.128 | 0.112 | 0.155      | 0.214  |
| Aug                                                 | 0.006    | 0.006 | 0.005 | 0.008      | 0.015  |
| Sep                                                 | 0.009    | 0.009 | 0.007 | 0.011      | 0.017  |
| Oct                                                 | 0.019    | 0.019 | 0.018 | 0.021      | 0.028  |
| Nov                                                 | 0.012    | 0.012 | 0.012 | 0.013      | 0.015  |
| Dec                                                 | 0.001    | 0.001 | 0.001 | 0.001      | 0.002  |

Table S6.. Uncertainties of isoprene ( $E_{iso}$ ) and monoterpene ( $E_{mtp}$ ) emissions used in the model scenarios for alder, aspen, sitka spruce and eucalyptus and taken from experimental data in Purser et al, 2021.

| Tree species | $E_{iso}$<br>/ $\mu\text{g C g}_{dw}^{-1} \text{h}^{-1}$ | $E_{mtp}$<br>/ $\mu\text{g C g}_{dw}^{-1} \text{h}^{-1}$ |
|--------------|----------------------------------------------------------|----------------------------------------------------------|
| Aspen        | 22.8 $\pm$ 14.6                                          | 0.17 $\pm$ 0.22                                          |
| Alder        | 0.03 $\pm$ 0.06                                          | 0.86 $\pm$ 1.77                                          |
| Eucalyptus   | 7.50 $\pm$ 7.26                                          | 1.30 $\pm$ 1.42                                          |
| Sitka spruce | 10.9 $\pm$ 7.66                                          | 3.4 $\pm$ 3.2                                            |
